# Supplementary material
Source: Research Square preprint supplement (doi:10.21203/rs.3.rs-9942622/v1)
Supplement: Supplementary file 1 [file 2ad5c71e1f00c467d37d6db4.docx]

**Supplementary**


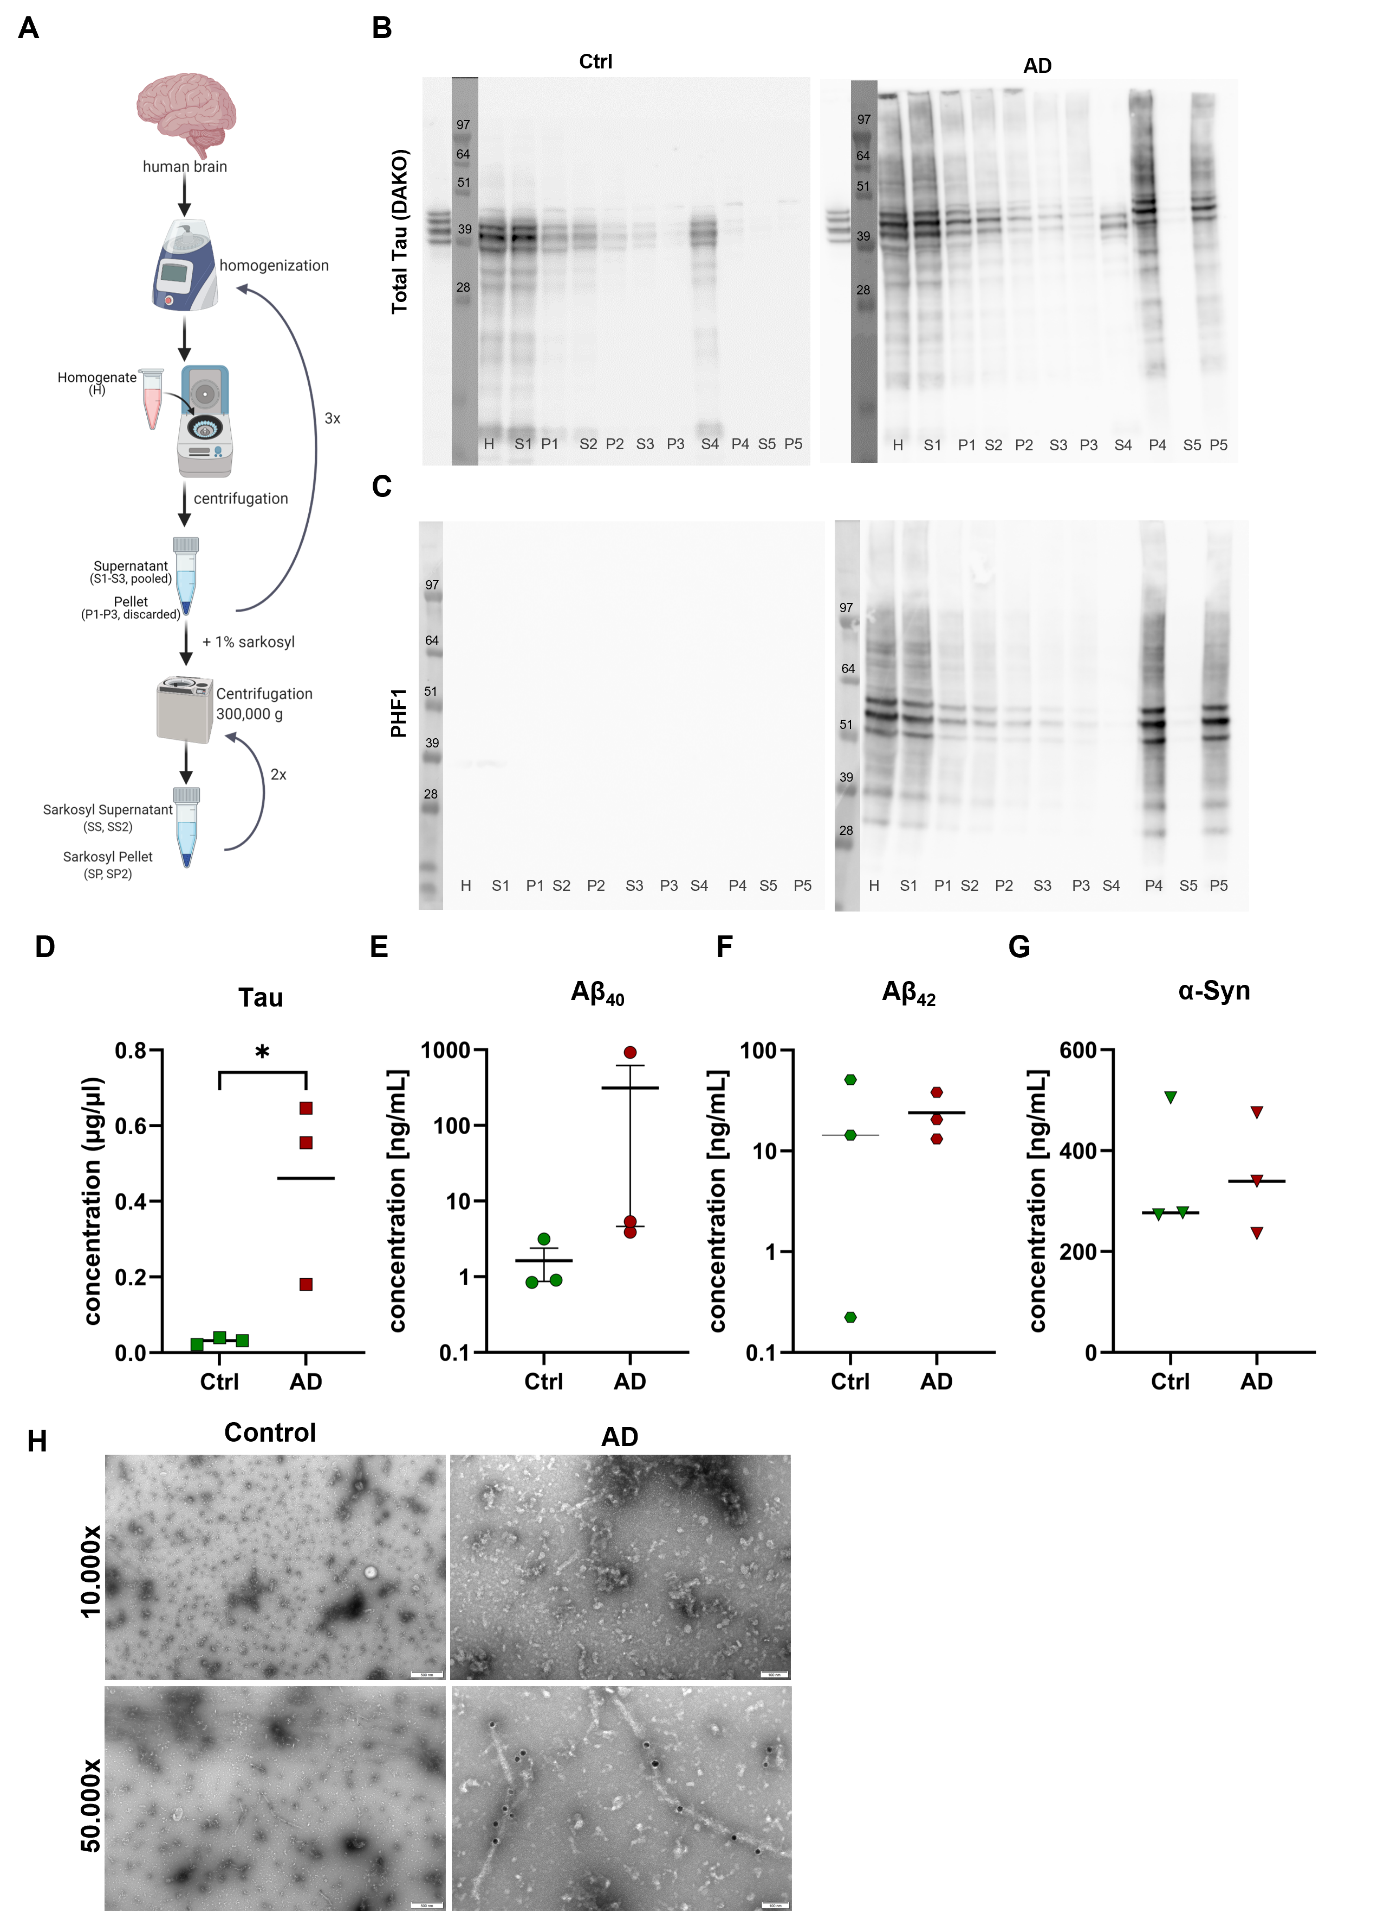


**Supplementary Figure 1. Biochemical characterization of AD brain-derived sarkosyl-insoluble Tau seeds (AD-Tau).
A**. Schematic overview of the sarkosyl-insoluble protein extraction protocol.
**B.** Western blot showing total Tau staining in control (Ctrl) and AD PHF fractions.
**C.** Western blot analysis of the phospho-epitope PHF1 in Ctrl and AD fractions.
**D.** Quantification of Tau levels by Western blot.
**E**. Measurement of Aβ₄₀ concentrations using Meso Scale Discovery (MSD) (p = 0.3697).
**F.** Measurement of Aβ₄₂ concentrations using MSD (p = 0.9059).
**G**. α-Synuclein quantification by dot blot analysis (p = 0.9905).
**H.** Representative electron micrographs of PHF fractions from control and AD brain extracts immunolabeled with Tau-5 and HT7 antibodies, followed by 15 nm gold-conjugated secondary antibodies. Lower panels show magnified views of the indicated regions.
Values are presented as mean ± SEM. Statistical analysis was performed using an unpaired t-test. *p < 0.05


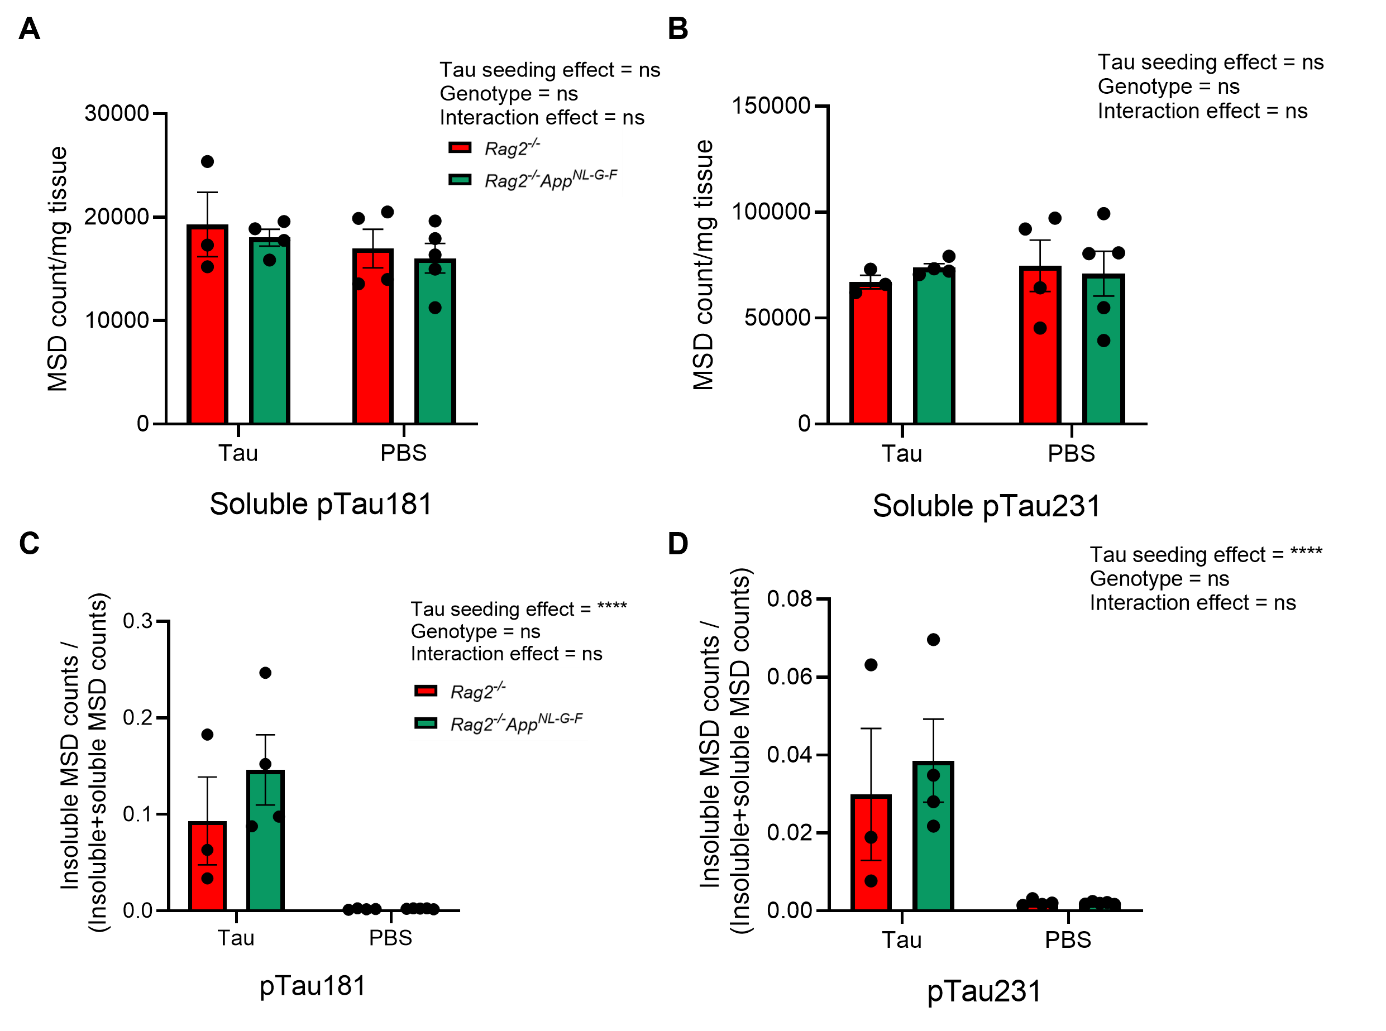


**Supplementary Figure 2. Soluble and ratio of sarkosyl-insoluble protein extracts analysed by ELISA to quantify pTau levels in *Rag2-/-* and *Rag2-/- AppNL-G-F* mice at 7 MPT.**
**A-B.** Human neurons express high levels of soluble **(A)** pTau181 and **(B)** pTau231 independent of amyloid or AD-Tau exposure likely due to developmental age. No significant effects were detected in two-way ANOVA.
**C-D.** Significant effect of tau seeding in fraction that shows insoluble pTau MSD counts/soluble+insoluble pTau MSD counts **(**pTau181 p<0.0001; pTau231 p<0.0001) was detected. No significant effect on genotype or interaction effect was measured.
For all graphs: *Rag2-/-* mice n=3 (AD-Tau) and n=4 (PBS); *Rag2-/- AppNL-G-F* mice n=4 (AD-Tau) and n=5 (PBS). Data are presented as mean  ± SEM. Statistical analysis was performed using two-way ANOVA. ****p < 0.0001, between indicated groups (Supplementary Table 1).


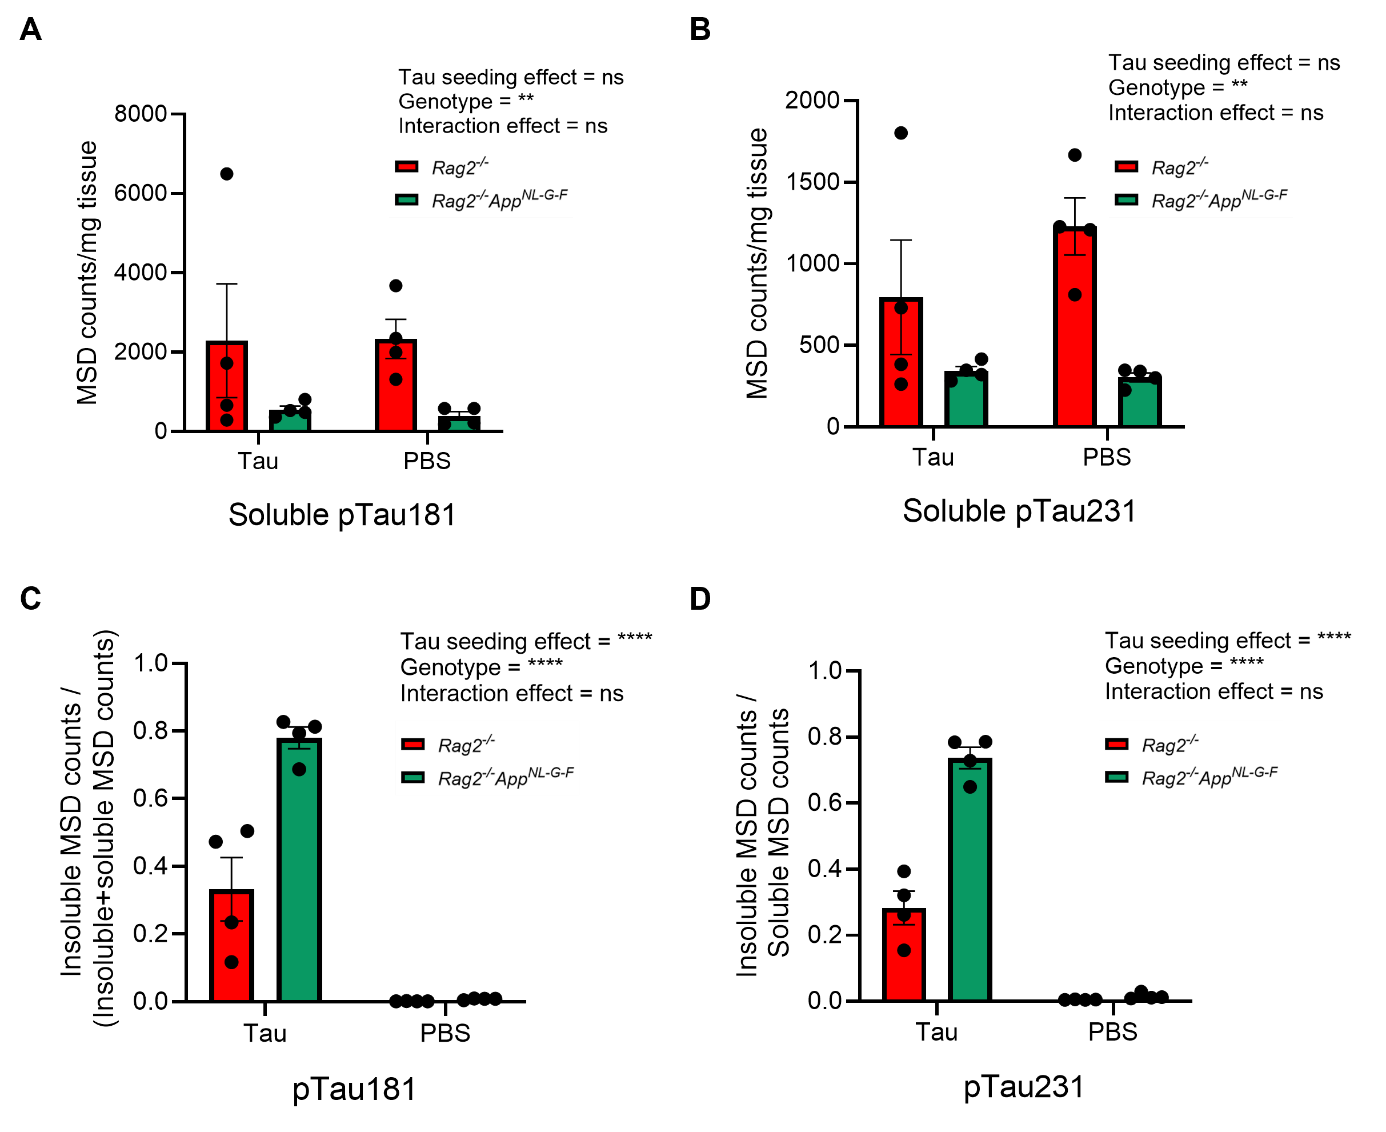


**Supplementary Figure 3. Soluble and sarkosyl-insoluble protein extracts analysed by ELISA to quantify pTau levels in *Rag2-/-* and *Rag2-/- AppNL-G-F* mice at 18 MPT.**
**A-B.** Significant effect of genotype in soluble **(A)** pTau181 (p=0.0049) and **(B)** pTau231 (p=0.0012) levels in *Rag2-/- AppNL-G-F* mice compared to *Rag2-/-* mice, which possibly reflects advanced neurodegeneration at 18MPT in *Rag2-/- AppNL-G-F* mice.
**C-D.** Significant effect of tau seeding in fraction that shows insoluble counts/(soluble+insoluble counts) **(**pTau181 p<0.0001; pTau231 p<0.0001) and on genotype (pTau181 p<0.0001; pTau231 p<0.0001) was detected. No significant interaction effect was measured.
Data are shown as mean  ±  SEM. Statistical significance was determined by two-way ANOVA with Tukey’s post hoc test. **p < 0.01, ****p<0.0001


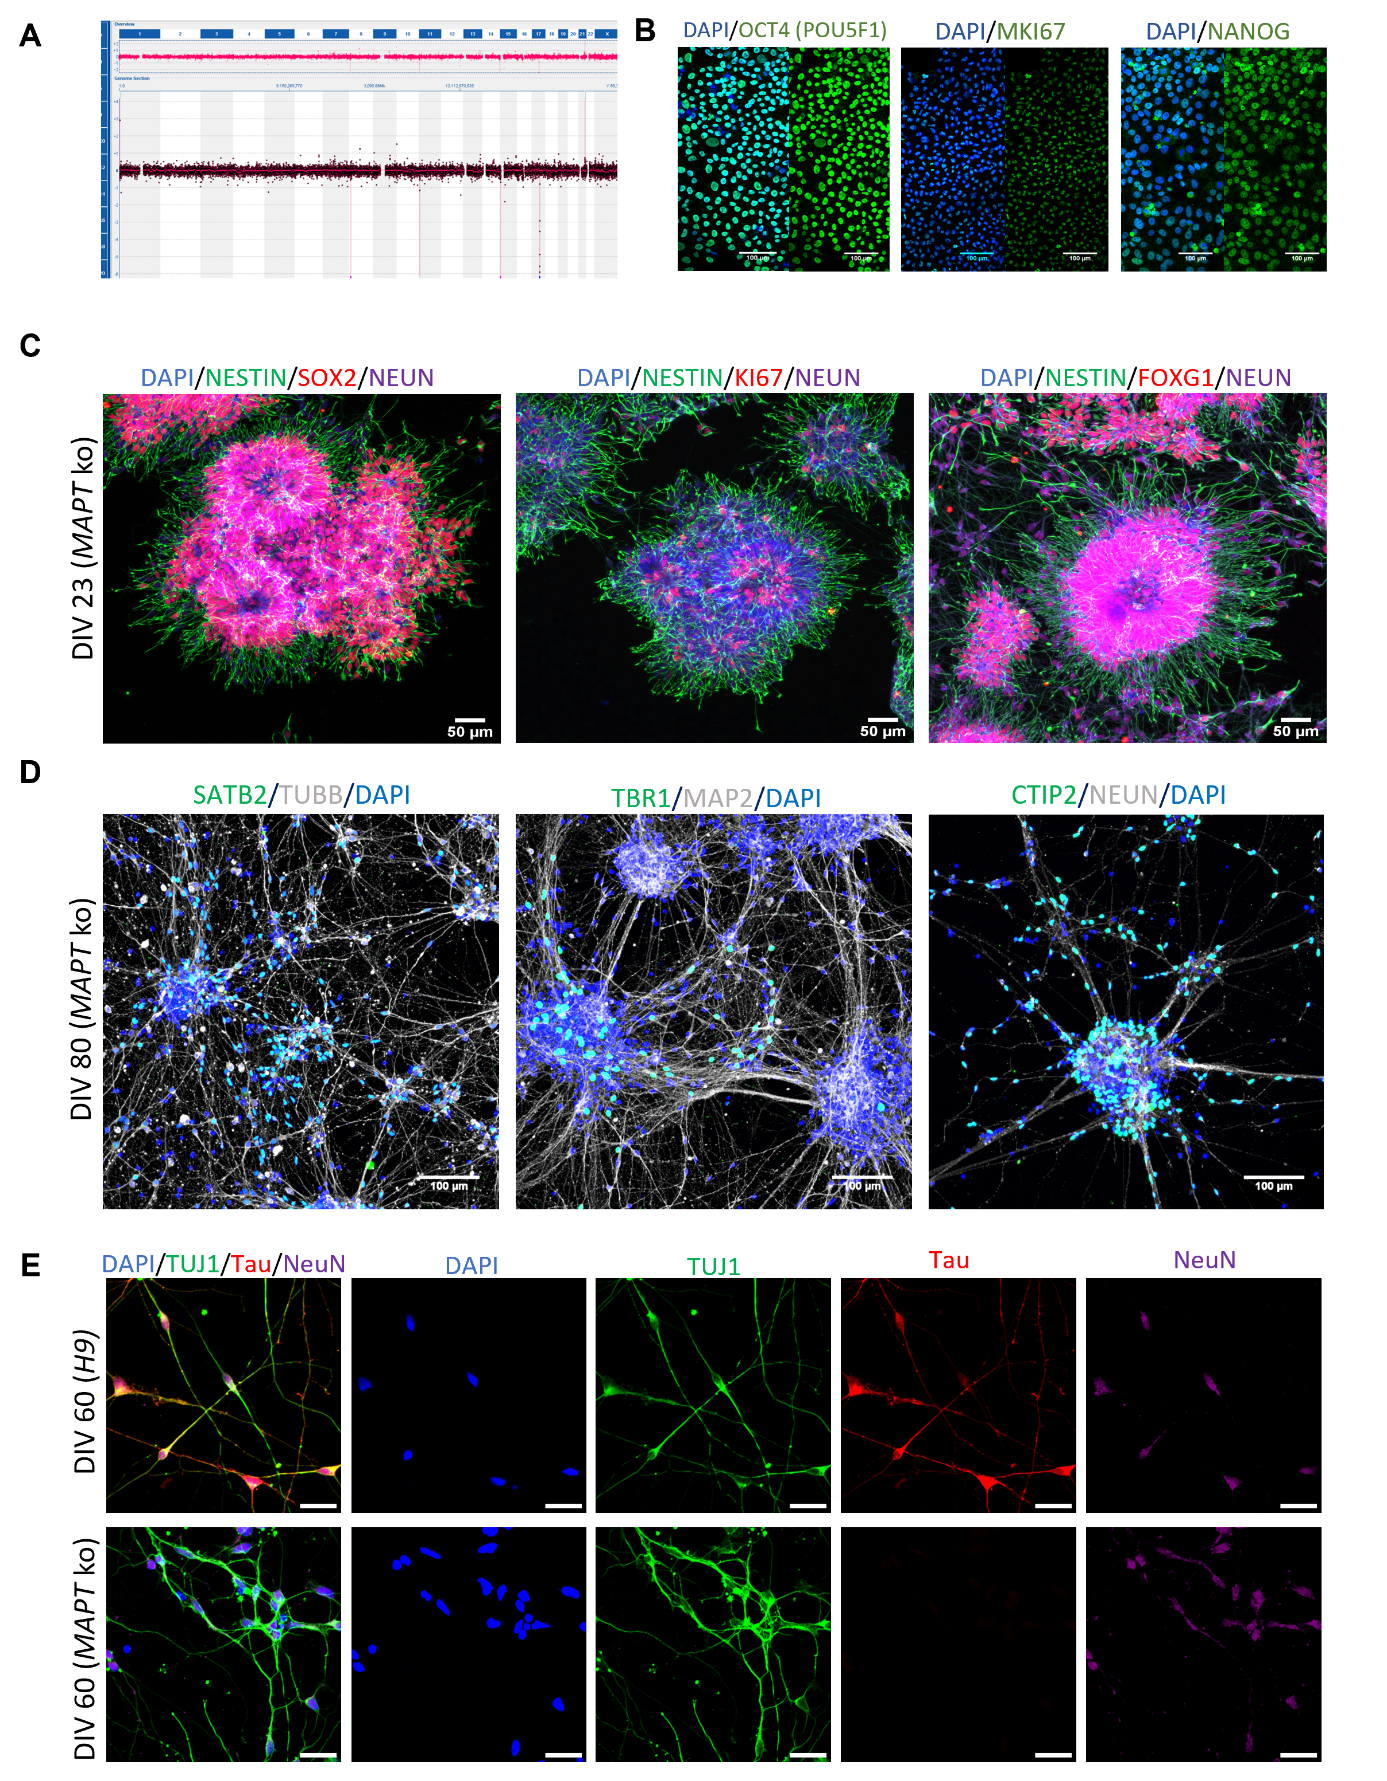


**Supplementary Figure 4. Quality control of gene editing and neuronal differentiation of the H9-Tau KO line**.
**A.** CGH array showing no chromosomal aberrations after gene editing except for the MAPT locus.
**B.** Immunolabelling of pluripotency markers for OCT4, MKI67 and NANOG (scale bar: 100µm).
**C.** NPC generation from the H9-Tau KO line expressing NESTIN, SOX2, KI67, FOXG1 and NEUN at DIV32 (scale bar: 50µm).
**D.** Neuronal immunolabelling of Tau KO neurons (DIV 80); cells express SATB2, TUBB, MAP2, TBR1, CTIP2 and NEUN (scale bar: 100µm).
**E.** Neuronal labelling of low-density Tau KO and H9-control neurons at DIV60 expressing TUJ1, NeuN, Tau labelling is absent in Tau KO neurons (scale bar: 25µm).
