# Supplementary material
Source: Research Square preprint supplement (doi:10.21203/rs.3.rs-9942622/v1)
Supplement: Supplementary file 1 [file 05f80d6906c31957dfadc945.xlsx]

## Sheet: Figure 1
Fig 1C	Normality				Equal variance				Statistical test
MC1 Load	Shapiro-Wilk test								Mann–Whitney test (two-tailed, exact)	U	P value	P value summary
	W	0.7092							AD-Tau vs Non-injected (grafted regions)	0	0.0286	*
	P value	0.0002							AD-Tau vs Non-injected (non-grafted regions)	8	>0,9999	ns
	Passed normality test (alpha=0.05)?	No
	P value summary	***							Wilcoxon signed-rank test (within same brain comparison (n=4))	W	P value	P value summary
									AD-Tau Grafted regions vs Non-grafted regions	0	0.125	ns
Fig 1D	Normality				Equal variance				Statistical test				Pair-wise comparisons
GFP	Shapiro-Wilk test				Levene Test				2-way ANOVA
data was log transformed	W	0.907			F (DFn, DFd)	P value			ANOVA table	F (DFn, DFd)	P value	P value summary
	P value	0.1039			(3,12)=2.52	0.108			Interaction	F (1, 12) = 0,1065	P=0,7498	ns
	Passed normality test (alpha=0.05)?	Yes			Passed (P > 0.05)?	Yes			Grafted vs Non-grafted	F (1, 12) = 168,1	P<0,0001	****
	P value summary	ns							Tau seeding	F (1, 12) = 0,4783	P=0,5024	ns

## Sheet: Figure 2
Fig 2D	Normality				Equal variance				Statistical test					Pair-wise comparisons
Insoluble ptau181	Shapiro-Wilk test				Levene Test				2-way ANOVA
data was log transformed	W	0.9364			F (DFn, DFd)	P value			ANOVA table	F (DFn, DFd)	P value	P value summary
	P value	0.307			(3,12)= 1,3357	0.3089			Interaction	F (1, 12) = 0,6208	P=0,4460	ns
	Passed normality test (alpha=0.05)?	Yes			Passed (P > 0.05)?	Yes			Tau seeding	F (1, 12) = 165,4	P<0,0001	****
	P value summary	ns							Genotype	F (1, 12) = 1,381	P=0,2628	ns
Fig 2E	Normality				Equal variance				Statistical test					Pair-wise comparisons
Insoluble pta231	Shapiro-Wilk test				Levene Test				2-way ANOVA
data was log transformed	W	0.9722			F (DFn, DFd)	P value			ANOVA table	F (DFn, DFd)	P value	P value summary
	P value	0.8735			(3,12)= 0,7639	0.5358			Interaction	F (1, 12) = 0,9988	P=0,3373	ns
	Passed normality test (alpha=0.05)?	Yes			Passed (P > 0.05)?	Yes			Tau seeding	F (1, 12) = 61,19	P<0,0001	****
	P value summary	ns							Genotype	F (1, 12) = 0,6687	P=0,4295	ns

## Sheet: Figure 3
Fig 3C	Normality				Equal variance				Statistical test				Pair-wise comparisons
Insoluble PTau181	Shapiro-Wilk test				Levene Test				2-way ANOVA
data was log transformed	W	0.9957			F (DFn, DFd)	P value			ANOVA table	F (DFn, DFd)	P value	P value summary	Tukey's multiple comparisons test	Summary	Adjusted P Value
	P value	0.585			(3,12)= 1,2155	0.3463			Interaction	F (1, 12) = 13,33	P=0,0033	**	SI-Tau:Control vs. SI-Tau:NLGF	**	0.0046
	Passed normality test (alpha=0.05)?	Yes			Passed (P > 0.05)?	Yes			Tau seeding	F (1, 12) = 784,9	P<0,0001	****	SI-Tau:Control vs. PBS:Control	****	<0,0001
	P value summary	ns							Genotype	F (1, 12) = 6,183	P=0,0286	*	SI-Tau:NLGF vs. PBS:NLGF	****	<0,0001
													PBS:Control vs. PBS:NLGF	ns	0.8422
Fig 3D	Normality				Equal variance				Statistical test				Pair-wise comparisons
Insoluble PTau231	Shapiro-Wilk test				Levene Test				2-way ANOVA
data was log transformed	W	0.9825			F (DFn, DFd)	P value			ANOVA table	F (DFn, DFd)	P value	P value summary	Tukey's multiple comparisons test	Summary	Adjusted P Value
	P value	0.9803			(3,12)= 0,7447	0.5458			Interaction	F (1, 12) = 15,24	P=0,0021	**	SI-Tau:Control vs. SI-Tau:NLGF	**	0.0054
	Passed normality test (alpha=0.05)?	Yes			Passed (P > 0.05)?	Yes			Tau seeding	F (1, 12) = 373,4	P<0,0001	****	SI-Tau:Control vs. PBS:Control	****	<0,0001
	P value summary	ns							Genotype	F (1, 12) = 5,211	P=0,0415	*	SI-Tau:NLGF vs. PBS:NLGF	****	<0,0001
													PBS:Control vs. PBS:NLGF	ns	0.8534

## Sheet: Figure 4
Fig 4F, pTau181	Normality				Equal variance				Statistical test				Pair-wise comparisons
	Shapiro-Wilk test				F test to compare variances				Unpaired t test
	W	0.8761			F, DFn, Dfd	6,534, 2, 2			P value	0.4114
	P value	0.2516			P value	0.2655			P value summary	ns
	Passed normality test (alpha=0.05)?	Yes			P value summary	ns			Significantly different (P < 0.05)?	No
	P value summary	ns			Significantly different (P < 0.05)?	No			One- or two-tailed P value?	Two-tailed
									t, df	t=0,9161, df=4
Fig 4F, pTau231	Normality				Equal variance				Statistical test				Pair-wise comparisons
	Shapiro-Wilk test				F test to compare variances				Unpaired t test
	W	0.8958			F, DFn, Dfd	10,29, 2, 2			P value	0.4815
	P value	0.3494			P value	0.1772			P value summary	ns
	Passed normality test (alpha=0.05)?	Yes			P value summary	ns			Significantly different (P < 0.05)?	No
	P value summary	ns			Significantly different (P < 0.05)?	No			One- or two-tailed P value?	Two-tailed
									t, df	t=0,7753, df=4

## Sheet: Fig S2
Fig S2A	Normality				Equal variance				Statistical test				Pair-wise comparisons
Soluble PTau181)	Shapiro-Wilk test				Levene Test				2-way ANOVA
	W	0.9722			F (DFn, DFd)	P value			ANOVA table	F (DFn, DFd)	P value	P value summary
	P value	0.8732			(3,12)= 0,824	0.4966			Interaction	F (1, 12) =0,008550	P=0,9279	ns
	Passed normality test (alpha=0.05)?	Yes			Passed (P > 0.05)?	Yes			Tau seeding	F (1, 12) = 1,454	P=0,2512	ns
	P value summary	ns							Genotype	F (1, 12) = 0,3867	P=0,5457	ns
Fig S2B	Normality				Equal variance				Statistical test				Pair-wise comparisons
Soluble PTau231	Shapiro-Wilk test				Levene Test				2-way ANOVA
	W	0.96659			F (DFn, DFd)	P value			ANOVA table	F (DFn, DFd)	P value	P value summary
	P value	0.7809			(3,12)= 2,5446	0.1052			Interaction	F (1, 12) = 0,3119	P=0,5868	ns
	Passed normality test (alpha=0.05)?	Yes			Passed (P > 0.05)?	Yes			Tau seeding	F (1, 12) = 0,06629	P=0,8012	ns
	P value summary	ns							Genotype	F (1, 12) = 0,02677	P=0,8728	ns
Fig S2C	Normality				Equal variance				Statistical test				Pair-wise comparisons
Insoluble/ (Soluble+ Insoluble PTau181)	Shapiro-Wilk test				Levene Test				2-way ANOVA
data was log transformed	W	0.9659			F (DFn, DFd)	P value			ANOVA table	F (DFn, DFd)	P value	P value summary
	P value	0.7681			(3,12)= 1,8405	0.9135			Interaction	F (1, 12) = 0,8326	P=0,3795	ns
	Passed normality test (alpha=0.05)?	Yes			Passed (P > 0.05)?	yes			Tau seeding	F (1, 12) = 262,9	P<0,0001	****
	P value summary	ns							Genotype	F (1, 12) = 2,796	P=0,1203	ns
Fig S2D	Normality				Equal variance				Statistical test				Pair-wise comparisons
Insoluble/ (Soluble+ Insoluble PTau231)	Shapiro-Wilk test				Levene Test				2-way ANOVA
data was log transformed	W	0.9406			F (DFn, DFd)	P value			ANOVA table	F (DFn, DFd)	P value	P value summary
	P value	0.3558			(3,12)= 2,1303	0.1497			Interaction	F (1, 12) = 0,8975	P=0,3621	ns
	Passed normality test (alpha=0.05)?	Yes			Passed (P > 0.05)?	yes			Tau seeding	F (1, 12) = 92,59	P<0,0001	****
	P value summary	ns							Genotype	F (1, 12) = 0,8685	P=0,3698	ns

## Sheet: Fig S3
Fig S3A	Normality				Equal variance			Statistical test				Pair-wise comparisons
Soluble PTau181	Shapiro-Wilk test				Levene Test			2-way ANOVA
data was log transformed	W	0.9499			F (DFn, DFd)	P value		ANOVA table	F (DFn, DFd)	P value	P value summary
	P value	0.4882			(3,12)= 3,7842	0.04033		Interaction	F (1, 12) = 1,689	P=0,2181	ns
	Passed normality test (alpha=0.05)?	Yes			Passed (P > 0.05)?	no		Tau seeding	F (1, 12) = 0,04235	P=0,8404	ns
	P value summary	ns						Genotype	F (1, 12) = 11,84	P=0,0049	**
Fig S3B	Normality				Equal variance			Statistical test				Pair-wise comparisons
Soluble PTau231	Shapiro-Wilk test				Levene Test			2-way ANOVA
data was log transformed	W	0.9184			F (DFn, DFd)	P value		ANOVA table	F (DFn, DFd)	P value	P value summary
	P value	0.1587			(3,12)= 3,9429	0.03601		Interaction	F (1, 12) = 2,969	P=0,1105	ns
	Passed normality test (alpha=0.05)?	Yes			Passed (P > 0.05)?	no		Tau seeding	F (1, 12) = 1,438	P=0,2535	ns
	P value summary	ns						Genotype	F (1, 12) = 17,74	P=0,0012	**
Fig S3C	Normality				Equal variance			Statistical test				Pair-wise comparisons
Insoluble/ (Soluble+ Insoluble PTau181)	Shapiro-Wilk test				Levene Test			2-way ANOVA
data was log transformed	W	0.9564			F (DFn, DFd)	P value		ANOVA table	F (DFn, DFd)	P value	P value summary
	P value	0.597			(3,12)= 2,4	0.1186		Interaction	F (1, 12) = 1,960	P=0,1868	ns
	Passed normality test (alpha=0.05)?	Yes			Passed (P > 0.05)?	Yes		Tau seeding	F (1, 12) = 532,7	P<0,0001	****
	P value summary	ns						Genotype	F (1, 12) = 37,32	P<0,0001	****
Fig S3D	Normality				Equal variance			Statistical test				Pair-wise comparisons
Insoluble/ (Soluble+ Insoluble PTau231)	Shapiro-Wilk test				Levene Test			2-way ANOVA
data was log transformed	W	0.9556			F (DFn, DFd)	P value		ANOVA table	F (DFn, DFd)	P value	P value summary
	P value	0.5835			(3,12)= 1,0689	0.3988		Interaction	F (1, 12) = 0,003599	P=0,9531	ns
	Passed normality test (alpha=0.05)?	Yes			Passed (P > 0.05)?	Yes		Tau seeding	F (1, 12) = 534,5	P<0,0001	****
	P value summary	ns						Genotype	F (1, 12) = 33,95	P<0,0001	****
